# Supplementary material for: High lubricity and electrical responsiveness of solvent-free ionic SiO2 nanofluids
Source: Royal Society of Chemistry journal article supplement (doi:10.1039/c7ta09649f), 2018-01-01
Supplement: c7ta09649f1.pdf [file c7ta09649f1.pdf]

**Electronic Supplementary Information (ESI)**

**High Lubricity and Electrical Responsiveness of Solvent-Free Ionic SiO<sub>2</sub> Nanofluids**

Yuexia Guo<sup>a,b</sup>, Ligang Zhang<sup>a</sup>, Ga Zhang<sup>a,c\*</sup>, Daoai Wang<sup>a</sup>, Tingmei Wang<sup>a</sup>, Qihua Wang<sup>a</sup>

<sup>a</sup> State Key Laboratory of Solid Lubrication, Lanzhou Institute of Chemical Physics, Chinese Academy of Sciences, 73000 Lanzhou, China

<sup>b</sup> University of Chinese Academy of Sciences, Beijing 100049, China

<sup>c</sup> Qingdao Center of Resource Chemistry & New Materials, Qingdao 266071, China

\*Corresponding author:

Ga Zhang, E-mail: [gzhang@licp.cas.cn](mailto:gzhang@licp.cas.cn)

**(S1) Structure characteristic of SiO<sub>2</sub>-DC5700-NPES and SiO<sub>2</sub>-PMPS-M2070 NFs by FTIR spectra**

Figure S1a compared the FTIR spectra of initiator SiO<sub>2</sub> NPs, SiO<sub>2</sub>-DC5700 salt and SiO<sub>2</sub>-DC5700-NPES NFs. The broad peak at 3425 cm<sup>-1</sup> in the spectrum of SiO<sub>2</sub> NPs is assigned to the H-O-H stretching modes of the free or adsorbed water. The peak at 1105 cm<sup>-1</sup> can be attributed to the Si-O-Si anti-symmetric vibrations. Another two characteristic peaks at 812 and 473 cm<sup>-1</sup> correspond to the symmetric stretch and bending mode of the Si-O-Si, respectively<sup>1</sup>. Three absorption peaks appearing at 2850 cm<sup>-1</sup>, 2925 cm<sup>-1</sup> (-CH<sub>2</sub>- stretching) and 1736 cm<sup>-1</sup> (C-N stretching) in the SiO<sub>2</sub>-DC5700 are all exact proofs that DC5700 has grown from the initiator particles. Whereas, the peaks at 1646 cm<sup>-1</sup> and 1470 cm<sup>-1</sup> are assigned to the stretching vibration of the benzene ring in NPES. In addition, the peaks at 2850 and 2925 cm<sup>-1</sup> in the spectrum of the solvent-free SiO<sub>2</sub> NFs has been strengthened, which is ascribed to the stretching vibration of -CH<sub>2</sub>- and -CH<sub>3</sub>- from NEPS. The above described results corroborated that the SiO<sub>2</sub> initiator were grafted in succession with corona and canopy.

Figure S1b gives the FTIR spectra of SiO<sub>2</sub>-PMPS salt and solvent-free SiO<sub>2</sub>-PMPS-M2070 NFs. As for SiO<sub>2</sub>-PMPS salt, the main absorption peaks at around 2948 and 1073 cm<sup>-1</sup> correspond to stretching vibrations of C-H and P=O, respectively, owing to grafting of PMPS onto the SiO<sub>2</sub> surface. Strong peaks at 2928 and 2860 cm<sup>-1</sup> are observed in the FTIR spectrum of SiO<sub>2</sub>-PMPS-M2070 NFs, which are ascribed to the stretching vibrations of -CH<sub>2</sub>- and -CH<sub>3</sub>- from M2070. Additionally, the peak at 1057 cm<sup>-1</sup> is assigned to the C-O stretching vibration of M2070. These results give evidence of chemical bonding between SiO<sub>2</sub> NPs, PMPS and M2070.

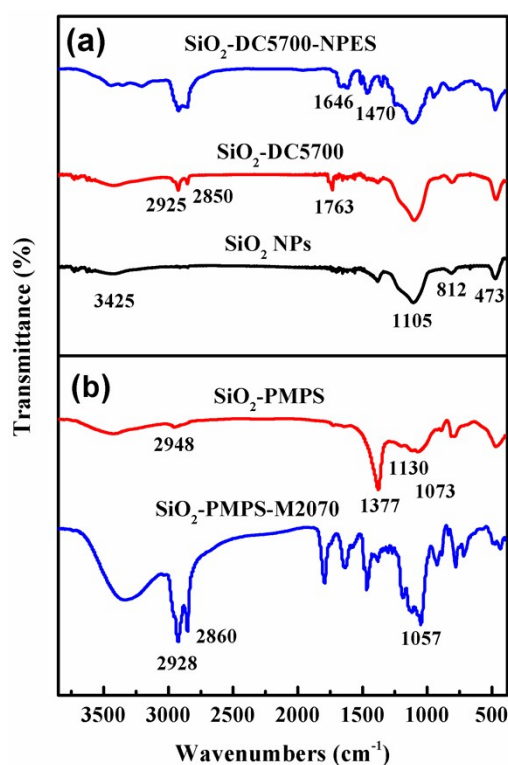

Figure S1. FTIR spectra of initiator SiO<sub>2</sub> NPs, SiO<sub>2</sub>-DC5700 salt and SiO<sub>2</sub>-DC5700-NPES NFs (a) and SiO<sub>2</sub>-PMPS, SiO<sub>2</sub>-PMPS-M2070 NFs (b).

### (S2) TGA analysis of SiO<sub>2</sub>-DC5700-NPES and SiO<sub>2</sub>-PMPS-M2070 NFs

Figure S2 shows the TGA curves of the solvent-free ionic SiO<sub>2</sub> NFs, it is seen clearly that the solvent-free SiO<sub>2</sub> NFs exhibited different thermal stabilities owing to the distinct organic corona and canopy structures. At temperatures lower than 180 °C,

obvious mass loss was not noticed for both kinds of solvent-free NFs, indicating that the NFs endowed with good thermal stabilities and did not contain any residual solvent. However, SiO<sub>2</sub>-DC5700-NPES NFs started to degrade at temperatures higher than 200 °C probably due to decomposition and oxidative degradation of low-molecular-weight fragments in the canopy polymer. With respect to SiO<sub>2</sub>-PMPS-M2070, no mass loss was noticed at temperatures lower than 300 °C, indicating its higher thermal stability than that of SiO<sub>2</sub>-DC5700-NPES NFs. The rather high thermal stability SiO<sub>2</sub>-PMPS-M2070 may allow potential applications under high temperature. Nonetheless, above 300 °C, both kinds of NFs started to degrade due to decomposition of the significant fraction of organic groups<sup>2</sup>.

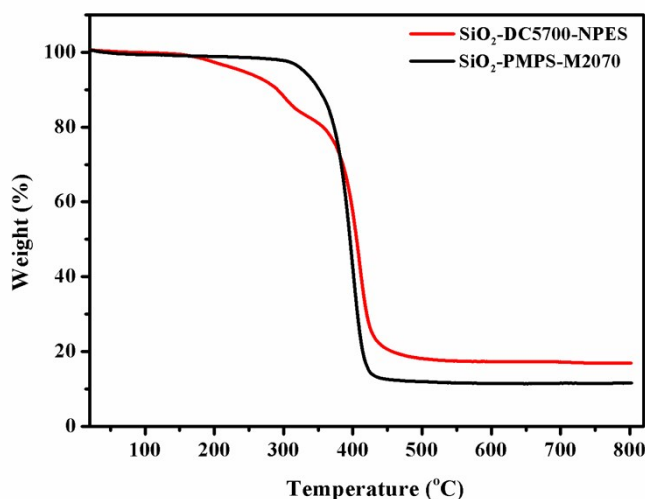

Figure S2. TGA curves of the solvent-free SiO<sub>2</sub> NFs

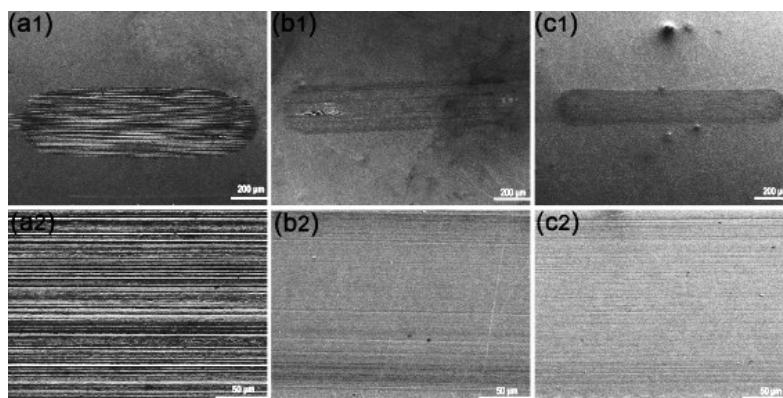

Figure S3. SEM micrographs of worn surfaces of the steel disks when lubricated with PEG (a1, a2), and PEG containing 5 wt% (b1, b2), 10 wt% (c1 and c2) solvent-free

SiO<sub>2</sub>-DC5700-NPES NFs.

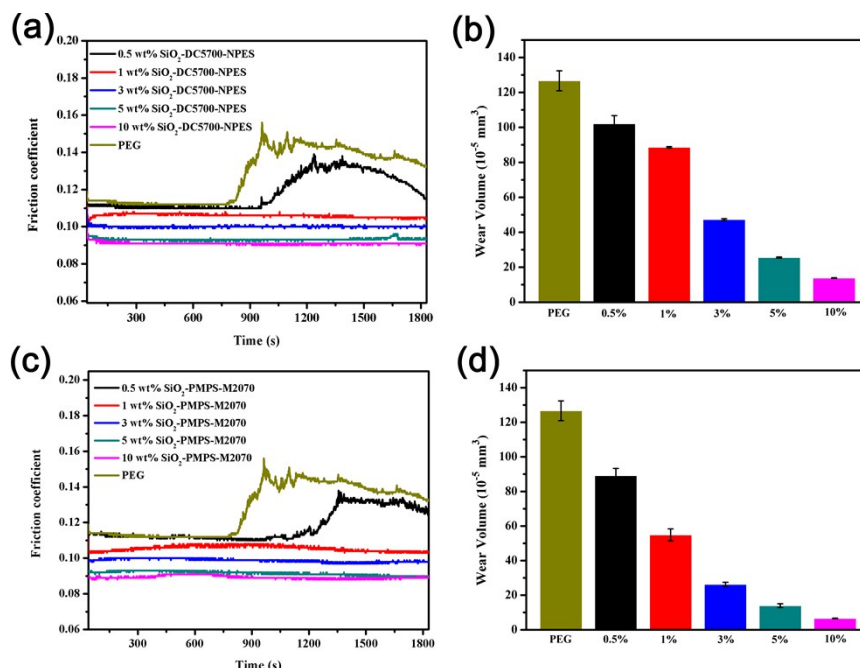

Figure S4. (a) Friction coefficients and (b) wear volumes of the steel disks lubricated with PEG and PEG containing SiO<sub>2</sub>-DC5700-NPES NFs additive at 100 N; (c) friction coefficients and (d) wear volumes of the steel disks lubricated with PEG and PEG containing SiO<sub>2</sub>-PMPS-M2070 NFs additive at 100 N.

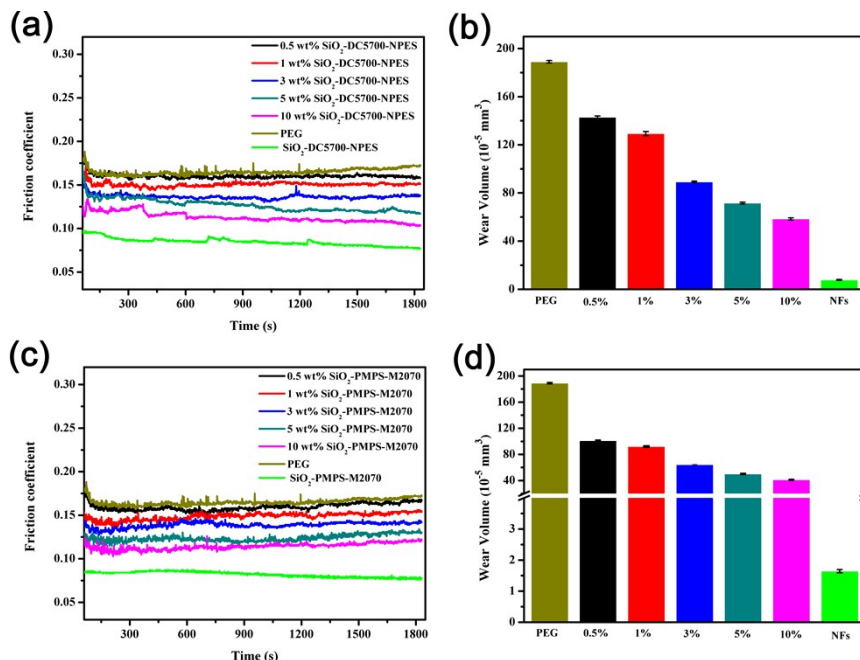

Figure S5. (a) Friction coefficients and (b) wear volumes of the steel disks lubricated with PEG and PEG containing SiO<sub>2</sub>-DC5700-NPES NFs additive under 100 °C; (c) friction coefficients and (d) wear volumes of the steel disks lubricated with PEG and PEG containing SiO<sub>2</sub>-PMPS-M2070 NFs additive under 100 °C.

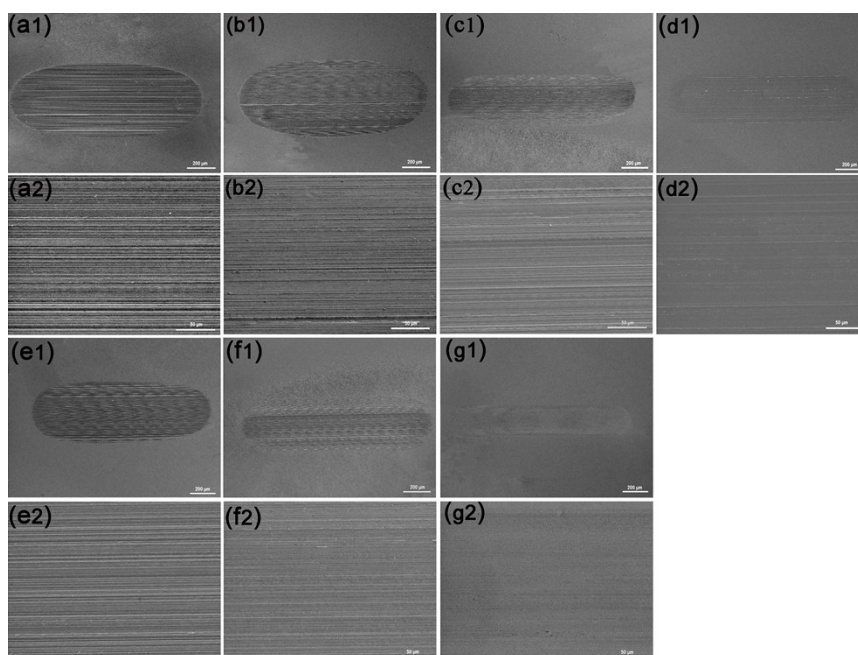

Figure S6. SEM micrographs of worn surfaces of the steel disks when lubricated with PEG (a1, a2); and PEG containing 1 wt% SiO<sub>2</sub>-DC5700-NPES NFs (b1, b2); 5 wt% SiO<sub>2</sub>-DC5700-NPES NFs (c1, c2); SiO<sub>2</sub>-DC5700-NPES NFs (d1, d2); 1 wt% SiO<sub>2</sub>-PMPS-M2070 NFs (e1, e2); 5 wt% SiO<sub>2</sub>-PMPS-M2070 NFs (f1, f2) and neat SiO<sub>2</sub>-PMPS-M2070 NFs (g1, g2) under 100 °C.

## References

- 1 G. H. Du, Z. L. Liu, X. Xia, Q. Chu and S. M. Zhang, *J. Sol-Gel Sci. Technol.*, 2006, **39**, 285-291.
- 2 H. P. Bai, Y. P. Zheng, T. Y. Wang and N. K. Peng, *J. Mater. Chem. A*, 2016, **4**, 14392-14399.
